# Supplementary material
Source: PubMed Central journal article supplement (PMC7496785)
Supplement: IMM-161-123-s001.pdf [file IMM-161-123-s001.pdf]

## Supplementary Table and Figures

**Supplementary Table S1.** Synthetic 517 bp DNAs and primers used to generate Survivin (SVN) derived immunogens.

| Survivin (SVN) derived immunogens | DNA sequences                                                                                                                                                                                                                                                                                                                                                                                                                                                                                                                                          |
|-----------------------------------|--------------------------------------------------------------------------------------------------------------------------------------------------------------------------------------------------------------------------------------------------------------------------------------------------------------------------------------------------------------------------------------------------------------------------------------------------------------------------------------------------------------------------------------------------------|
| WT-Full SVN                       | ACAGGCTGTCGCCGTGCTCATTGATCCATGGTGTATATTACTGTGCGATGGGAGCACCAGCACTACCACAAATATGGCAAC<br>TATACCTAAAAAATACCGAATAGCAACATTCAAAAACTGGCCATTCTAGAAAGACTGCGCATGCACACCAGAACGAATGGC<br>AGAAGCAGGATTCATACACTGCCCAACAGAAAAACGAACCAGACCTAGCACAATGCTTCTTCTGCTTCAAAGAACTAGAAGGA<br>TGGGAACCAGACGACAACCCAATAGAAGAACCAGAAAACTCACCAGGATGCGCATTCTAACAGTAAAAAACAATG<br>GAAGAATAACAGTATCAGAATTCCTAAAACTAGACGACAACGAGCAAAAAACAATAAGCAAAAGAAACAACAACAAC<br>AAAAAGAATTCGAAGAAACAGCAAAAAACAACGACAATCAATAGAACAACACTAGCAGCATGGGGCCAGGGAACCTAGGGAT<br>CCATCAGAAGGGATCTTGTGCCGCC       |
| VEL-Full SVN                      | ACAGGCTGTCGCCGTGCTCATTGATCCATGGTGTATATTACTGTGCGATGGGAGCACCANNKCTACCACAAATATGGCAAC<br>TATACCTANNKAACACTANNKATAGCANNKTTCAAAAACTGGCCATTCTANNKGACNNKGCANNKACACCANNKCGAATGGC<br>AGAAGCAGGATTCATACACTGCCCAACAGAAAAACGAACCAGACCTAGCACAANNKTTCTTCTGCTTANNKGAAC TAGAAGGA<br>TGGNNKCCANNKGACNNKCCAATAGAAGAAANNKCGAAAACTCACCAGGATGCGCATTNNKACANNKAAANNKCAAATG<br>GAANNKCTAACANNKTCANNKTTCTAAAACTANNKCGACAANNKGCAAAAACAANNKGCAAAAGAAACAACAACAAC<br>AAAAANNKTTGAAGAAACAGCANNKACAACACGACAATCAATAGAACAACACTAGCAGCATGGGGCCAGGGAACCTAGGGAT<br>CCATCAGAAGGGATCTTGTGCCGCC |
|                                   | <b>Primers (Oligonucleotides)*</b>                                                                                                                                                                                                                                                                                                                                                                                                                                                                                                                     |
| WT-Full SVN<br>VEL-Full SVN       | <b>5SF:</b> TATTCGTCTGCAGGACCATGGTGTATATTACTGTGCGATG<br><b>3SNT:</b> TACTTATCTAGAGGATCCCTAGGTGACCGTCTTGCCATTCG                                                                                                                                                                                                                                                                                                                                                                                                                                         |
| WT-NT<br>VEL-NT                   | <b>5SF:</b> TATTCGTCTGCAGGACCATGGTGTATATTACTGTGCGATG<br><b>3SFX:</b> ATACGTTCTAGAGGATCCCTAGGTTCCTTGCC                                                                                                                                                                                                                                                                                                                                                                                                                                                  |
| WT-Core<br>VEL-Core               | <b>5SM:</b> GCTATCCTGCAGGACCATGGAGCAGGATTCATACACTGC<br><b>3SM:</b> TATATTGTCTAGAGGATCCCTAGGTGACCACTTCCATTTG                                                                                                                                                                                                                                                                                                                                                                                                                                            |
| WT-CT<br>VEL-CT                   | <b>5SCT:</b> TTACATGCTGCAGTACCATGGTCAAATGGAA<br><b>3SNT:</b> TACTTATCTAGAGGATCCCTAGGTGACCGTCTTGCCATTCG                                                                                                                                                                                                                                                                                                                                                                                                                                                 |

**NNK:** where **N**= G, A, T or C and **K**= G or T.

\*Oligonucleotide (oligos) pairs carrying Nco I and Bam HI restriction sites (underlined in oligos).

# Supplementary Figure S1

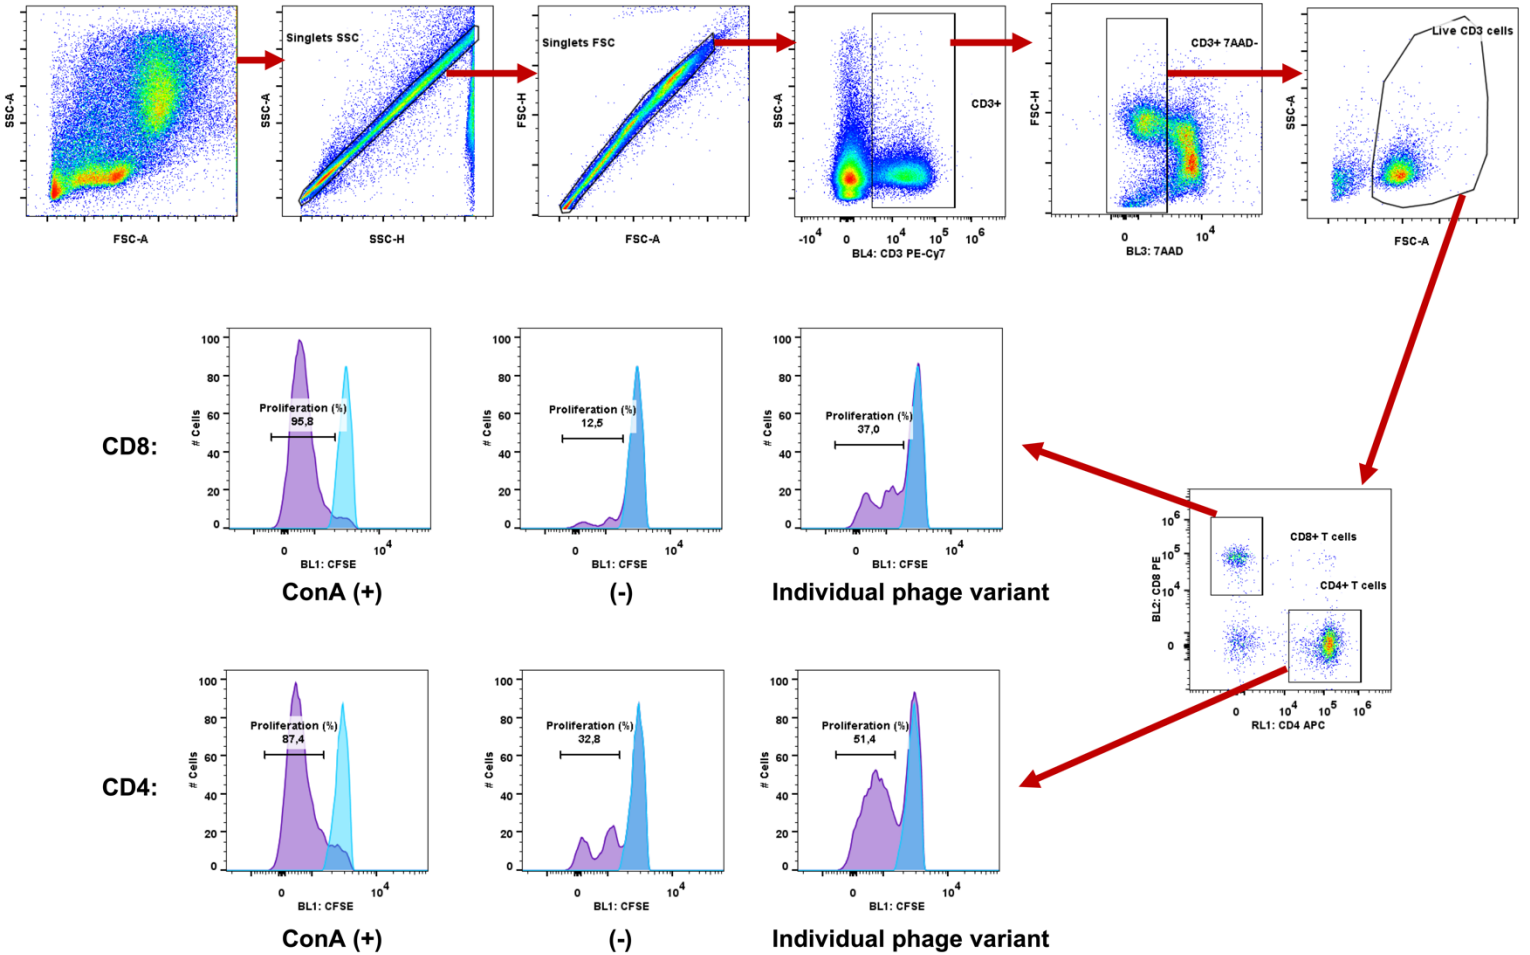

**Supplementary Figure S1.** Representative flow cytometric analysis of CD4<sup>+</sup> and CD8<sup>+</sup> T cell proliferation, derived from spleen cells using CFSE.

This figure shows the staining of CD4<sup>+</sup> and CD8<sup>+</sup> spleen cells with CFSE, histograms for controls are also shown: positive for proliferation using concanavalin A (ConA), negative for proliferation (without stimulation) and a stimulus with an individual variant antigen displayed on phage.

## Supplementary Figure S2

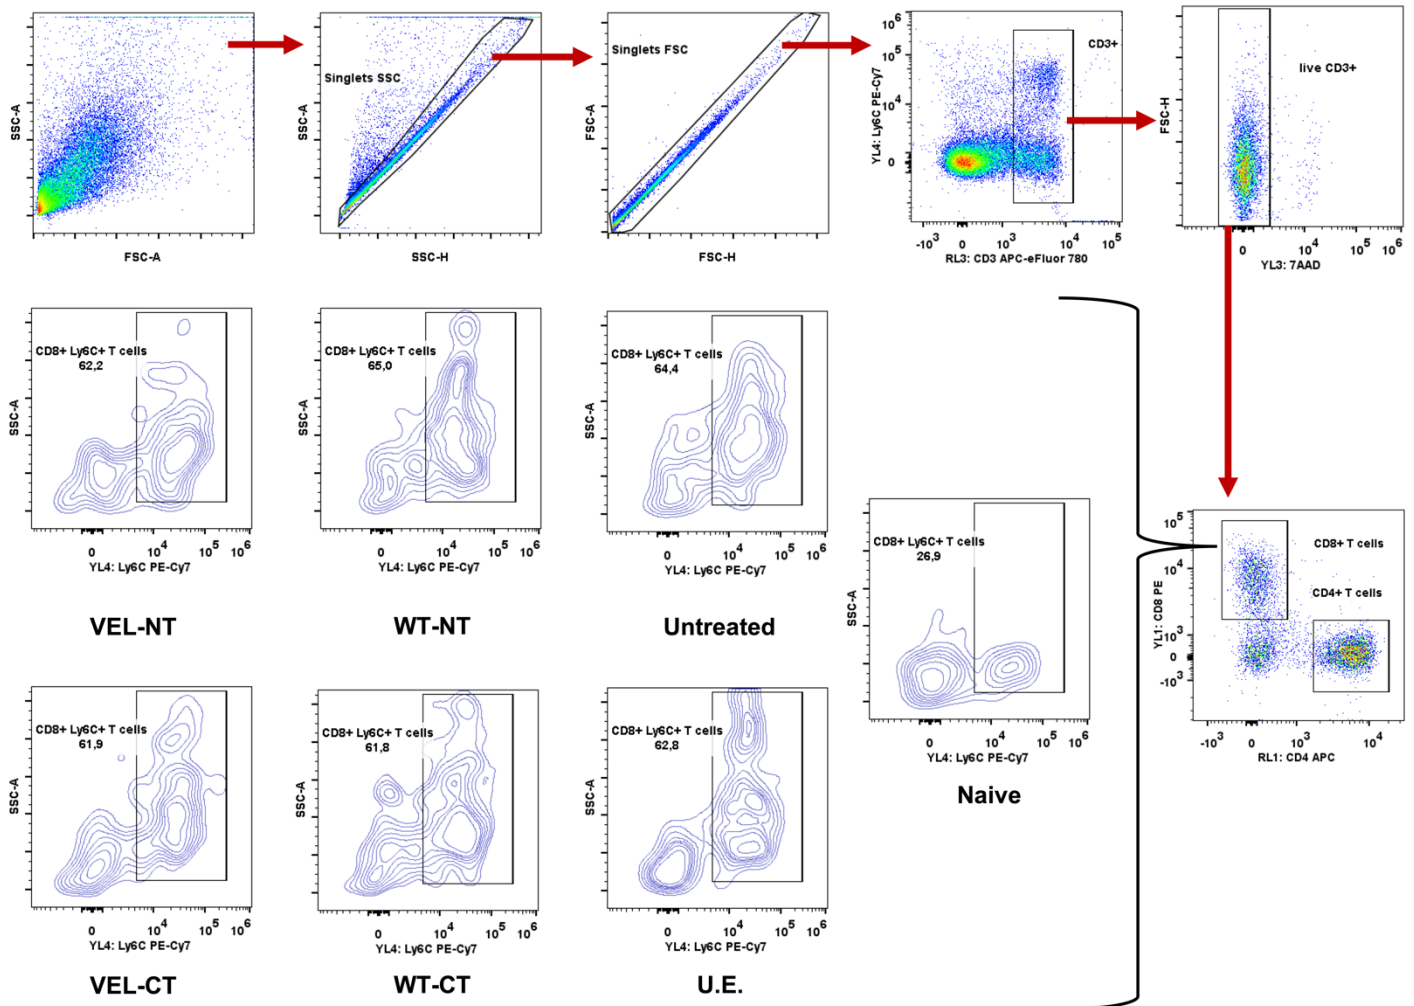

**Supplementary Figure S2.** Representative flow cytometric analysis of CD8<sup>+</sup>Ly6C<sup>+</sup> effector T cell phenotyping from lung tissue samples.

Figure represents CD8<sup>+</sup>Ly6C<sup>+</sup> effector T cells. The following gating strategy was applied to obtain results: cells separated into double singlets; identification of live CD3<sup>+</sup> cells; identification of CD8<sup>+</sup> and CD4<sup>+</sup> from previous; and finally, identification of effector CD8<sup>+</sup>Ly6C<sup>+</sup> T cells. Representative dot plot graphs shown for treatments with VEL-NT, WT-NT, VEL-CT, WT-CT, Untreated, U.E. and naive mice.

## Supplementary Figure S3

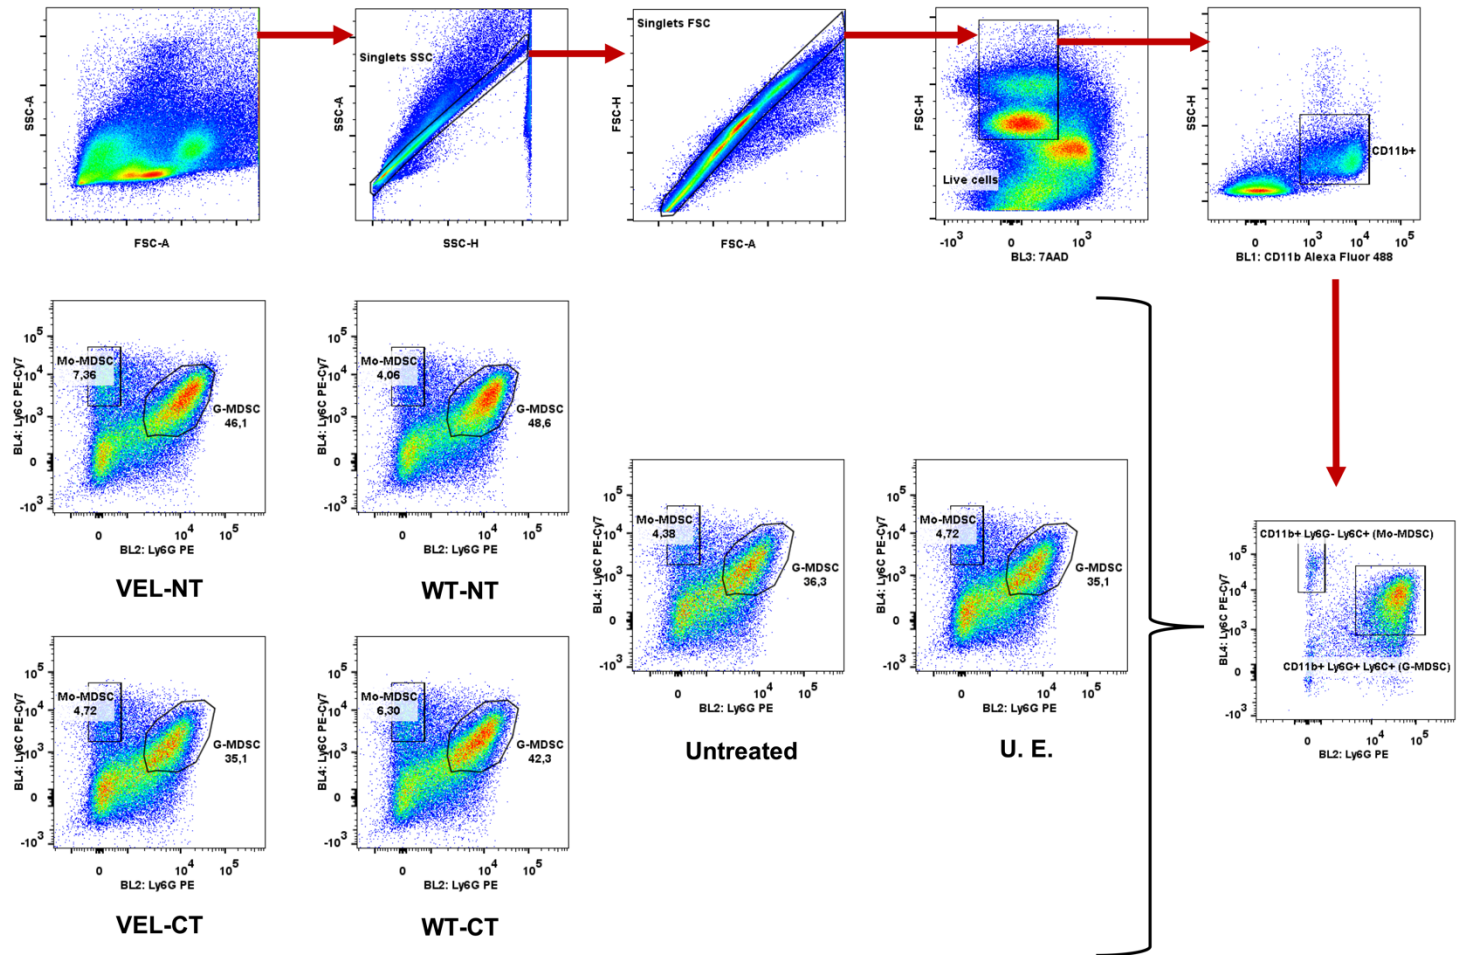

**Supplementary Figure S3.** Representative flow cytometric analysis of CD11b<sup>+</sup>Ly6C<sup>int/low</sup>Ly6G<sup>+</sup> granulocytic myeloid-derived suppressor cells (G-MDSCs) phenotyping from tumor tissue sample.

Figure represents gating strategy used to identify G-MDSC cells. Separation of cells into double singlets; identification of live CD11b<sup>+</sup> cells; and finally, identification of CD11b<sup>+</sup>Ly6C<sup>int/low</sup>Ly6G<sup>+</sup> cells. Representative dot plot graphs shown for treatments with VEL-NT, WT-NT, VEL-CT, WT-CT, Untreated, U.E.

## Supplementary Figure S4

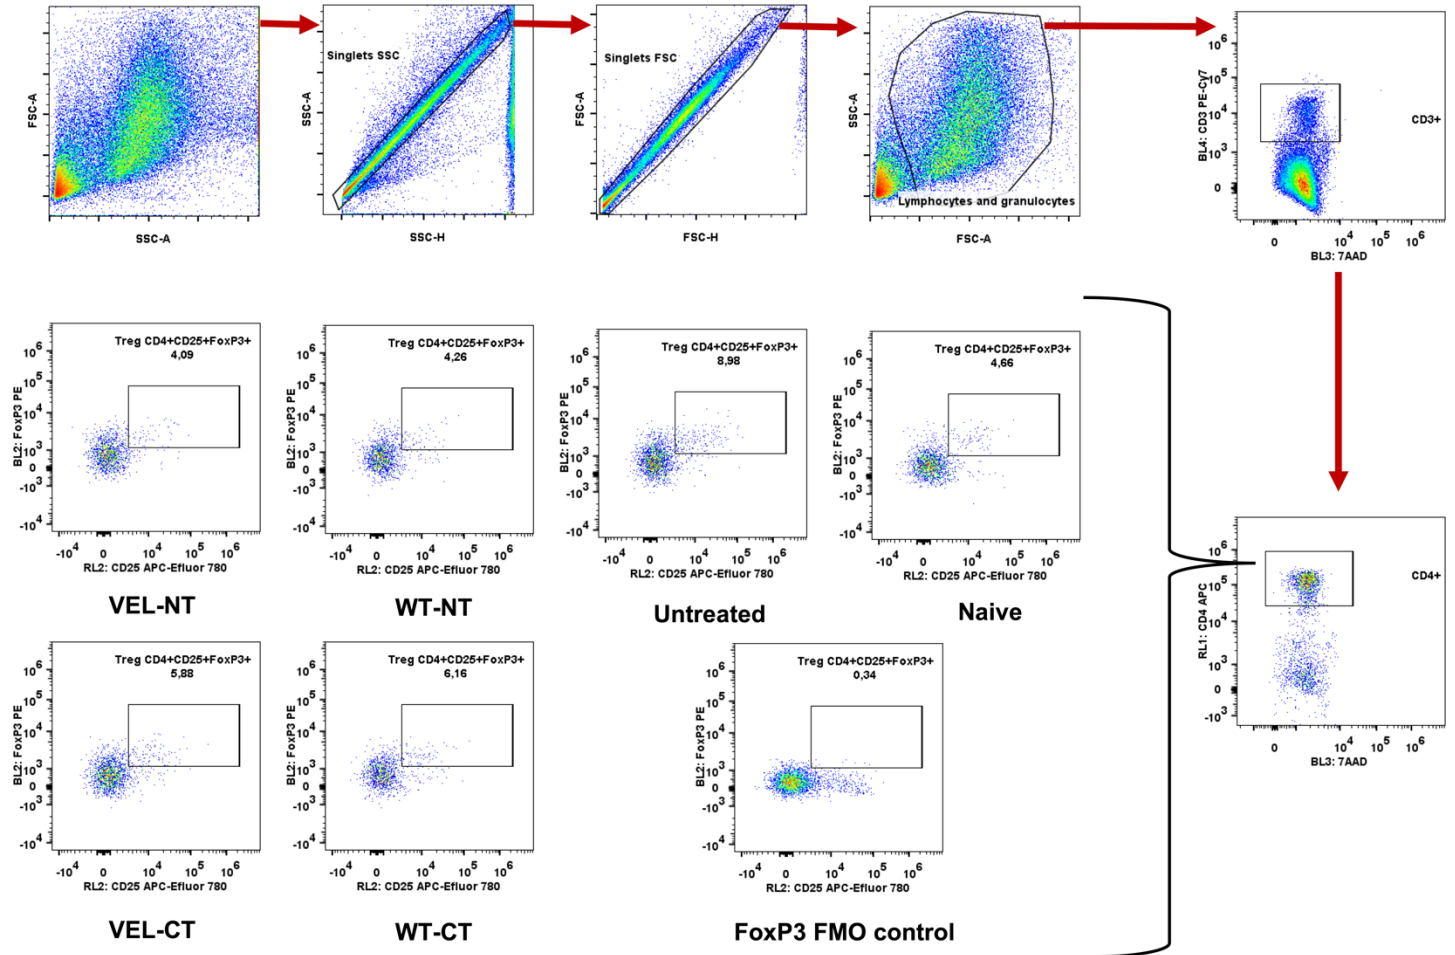

**Supplementary Figure S4.** Representative flow cytometric analysis of CD4<sup>+</sup>CD25<sup>+</sup>FoxP3<sup>+</sup> regulatory T cells (T<sub>regs</sub>) phenotyping from lung tissue sample.

Figure represents strategy used to identify T<sub>reg</sub> cells. Separation of cells into double singlets; identification of live CD3<sup>+</sup>CD4<sup>+</sup> cells; and finally, identification of CD4<sup>+</sup>CD25<sup>+</sup>FoxP3<sup>+</sup> cells. Representative dot plot graphs are shown for treatments with VEL-NT, WT-NT, VEL-CT, WT-CT, Untreated, Naive mice and Fluorescence Minus One (FMO) Control for FoxP3.

## Supplementary Figure S5

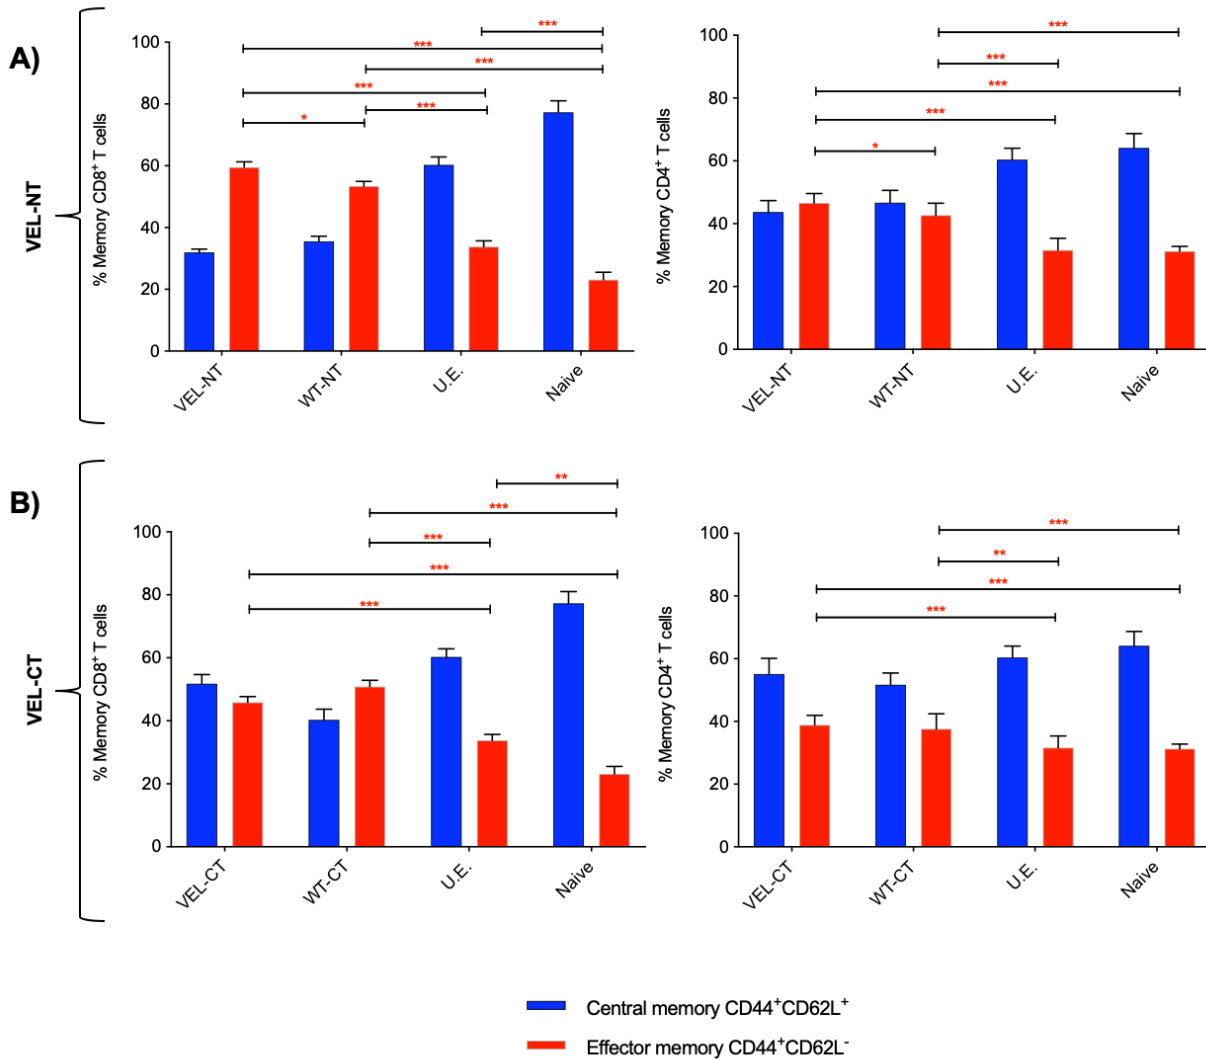

**Supplementary Figure S5.** The phenotyping of Memory T cells.

We measured by multiparametric flow-cytometry *ex-vivo* the presence of central memory and effector memory CD8<sup>+</sup> and CD4<sup>+</sup> T cells within the spleens, showing significantly higher level of effector memory T cells in mice immunized with VEL-NT **(A)** or VEL-CT **(B)** at day 90 after vaccination. Percentages of T cells (%) are presented as mean  $\pm$  95 CI and were analyzed with two-way ANOVA for repeated measurements and Sidak “post-hoc” test for multiple comparisons (\* $P < 0.033$ , \*\* $P < 0.02$ , \*\*\* $P < 0.001$ ).
